# Supplementary material
Source: MDPI journal article supplement (https://www.mdpi.com/2304-6740/5/2/18)
Supplement: s1 [file s1]

# Supplementary Materials: Adsorption and Oxidation of Aromatic Amines on Metal(II) Hexacyanocobaltate(III) Complexes: Implication for Oligomerization of Exotic Aromatic Compounds

Rachana Sharma, Md. Asif Iqbal, Sohan Jheeta and Kamaluddin

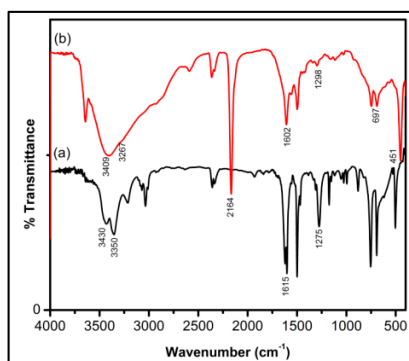

**Figure S1:** FT-IR spectra of aniline before (a) and after (b) interaction with zinc hexacyanocobaltate(III)

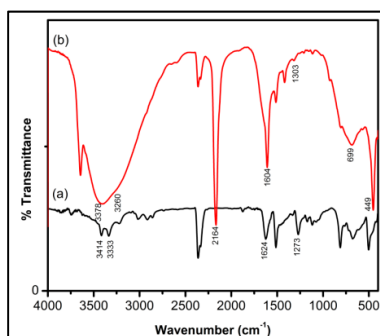

**Figure S2:** FT-IR spectra of 4-methylaniline before (a) and after (b) interaction with zinc hexacyanocobaltate(III)

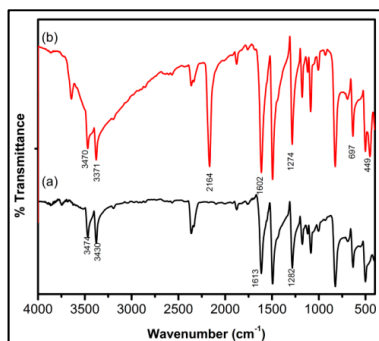

**Figure S3:** FT-IR spectra of 4-chloroaniline before (a) and after (b) interaction with zinc hexacyanocobaltate(III)

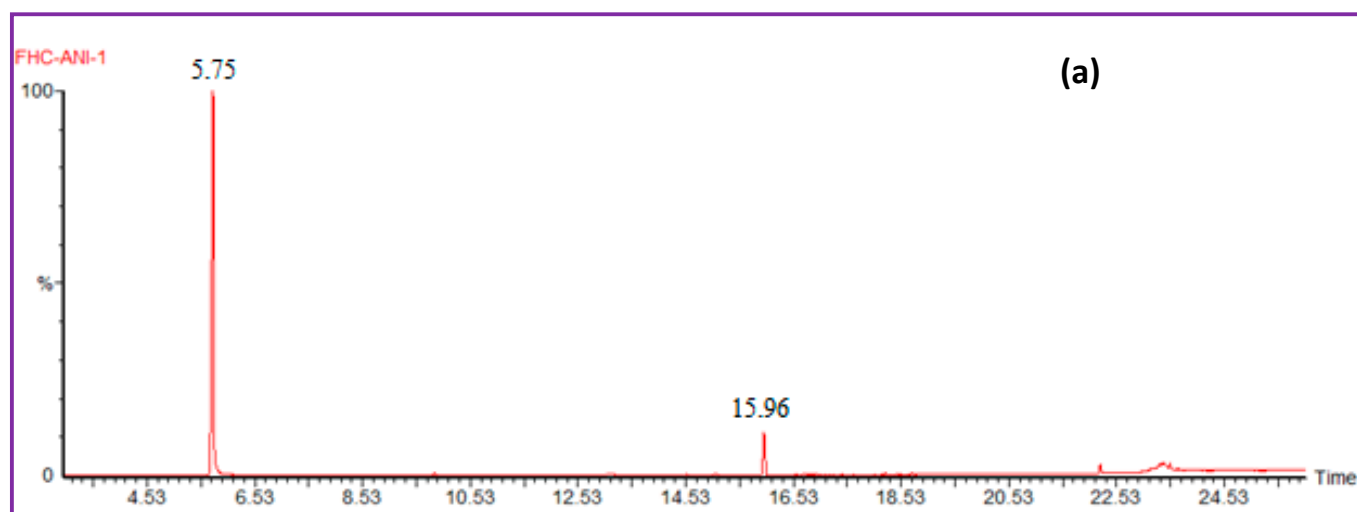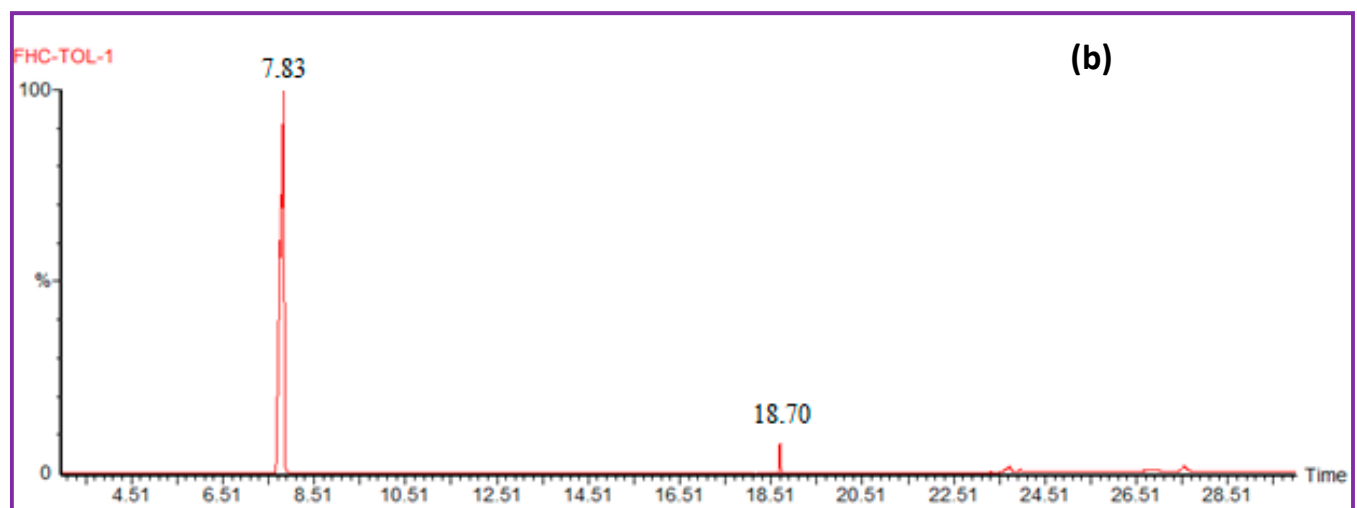

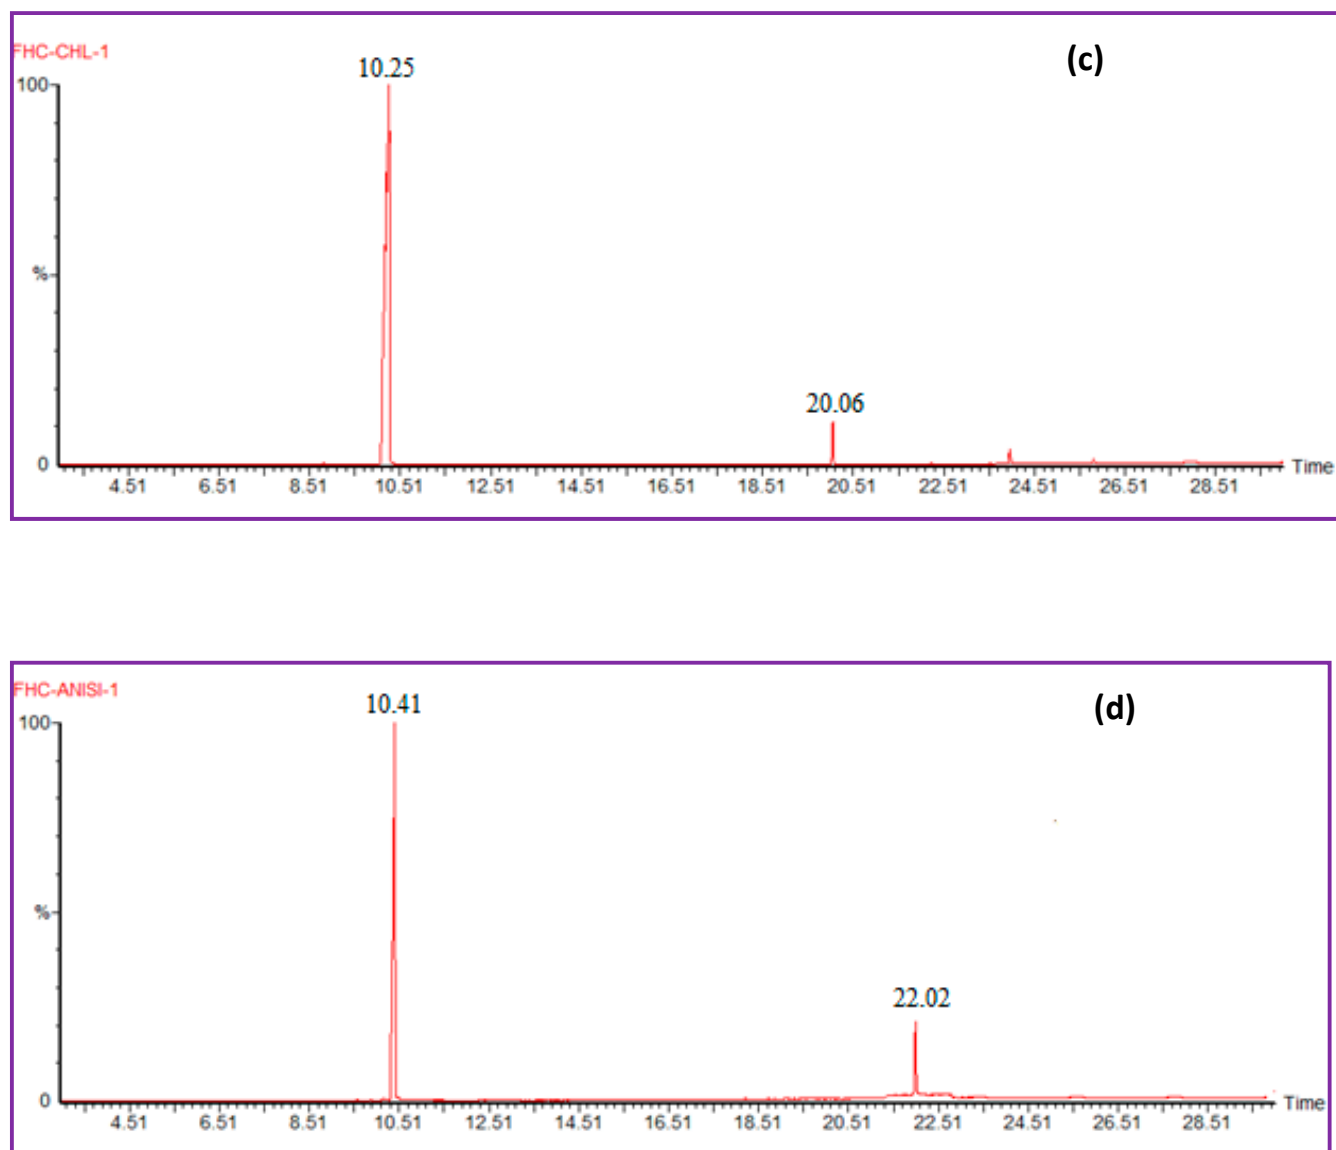

**Figure S4:** Chromatogram of reaction products of (a) aniline, (b) 4-methylaniline, (c) 4-chloroaniline and (d) 4-methoxyaniline with FeHCCo.

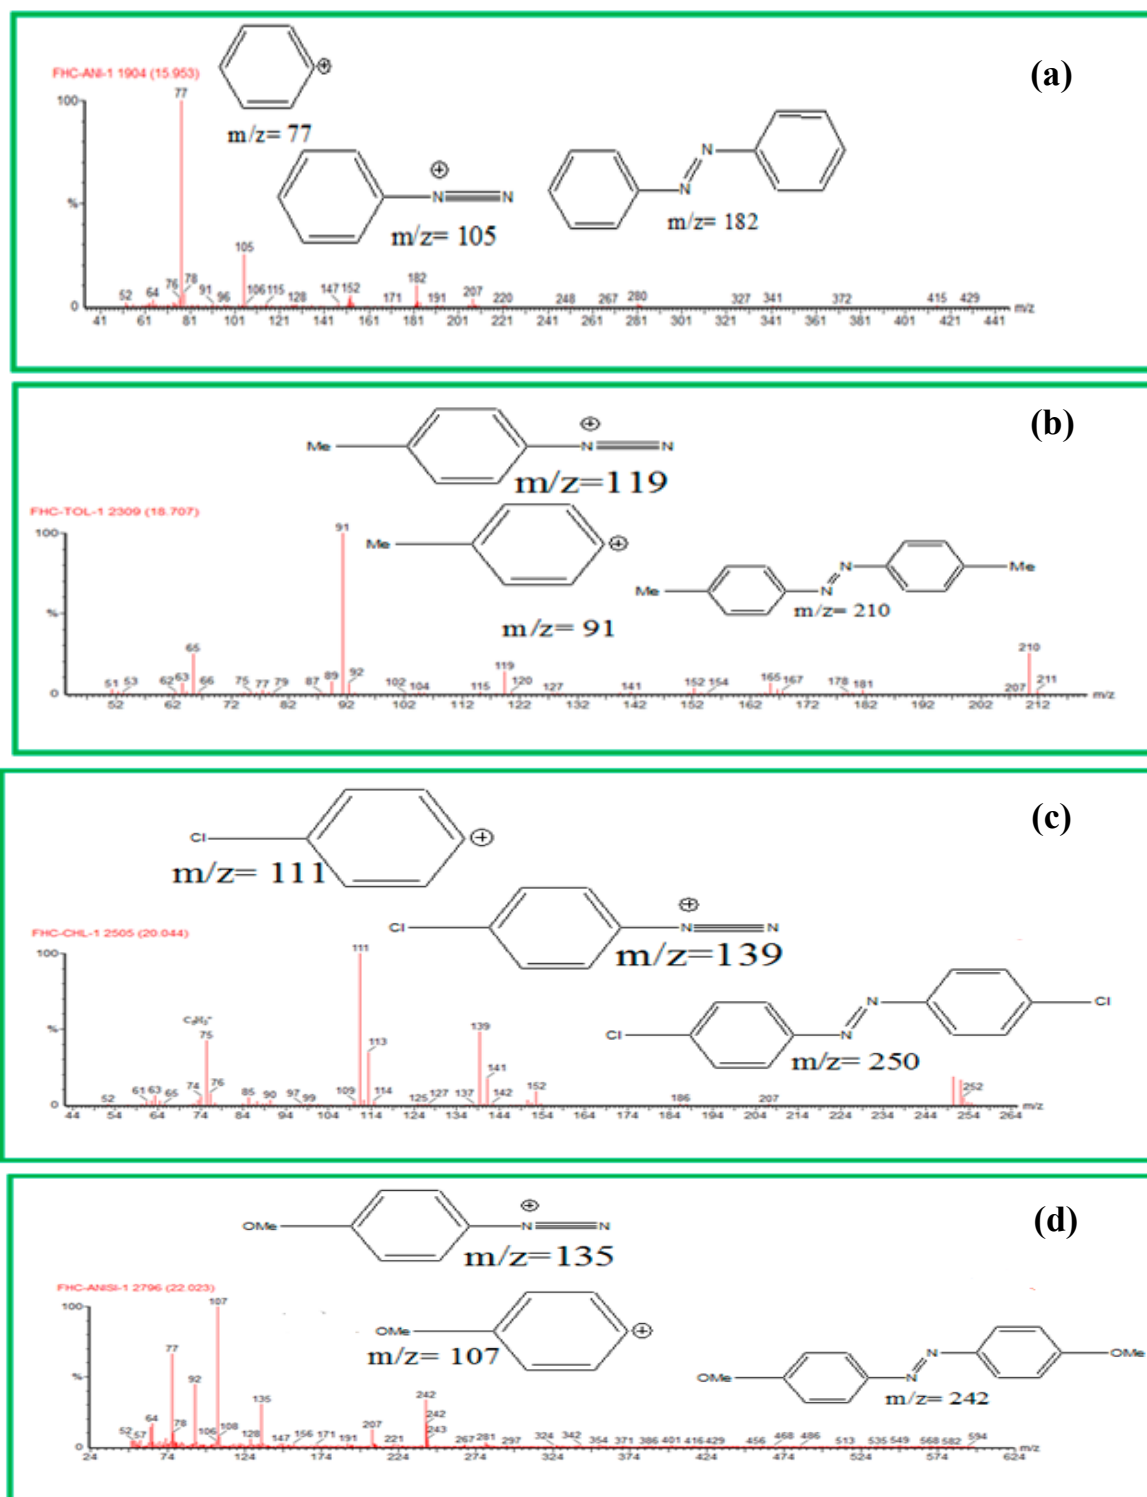

**FigureS5:** Mass spectra of reaction products of (a) aniline, (b) 4-methylaniline, (c) 4-chloroaniline and (d) 4-methoxyaniline with FeHCCo.

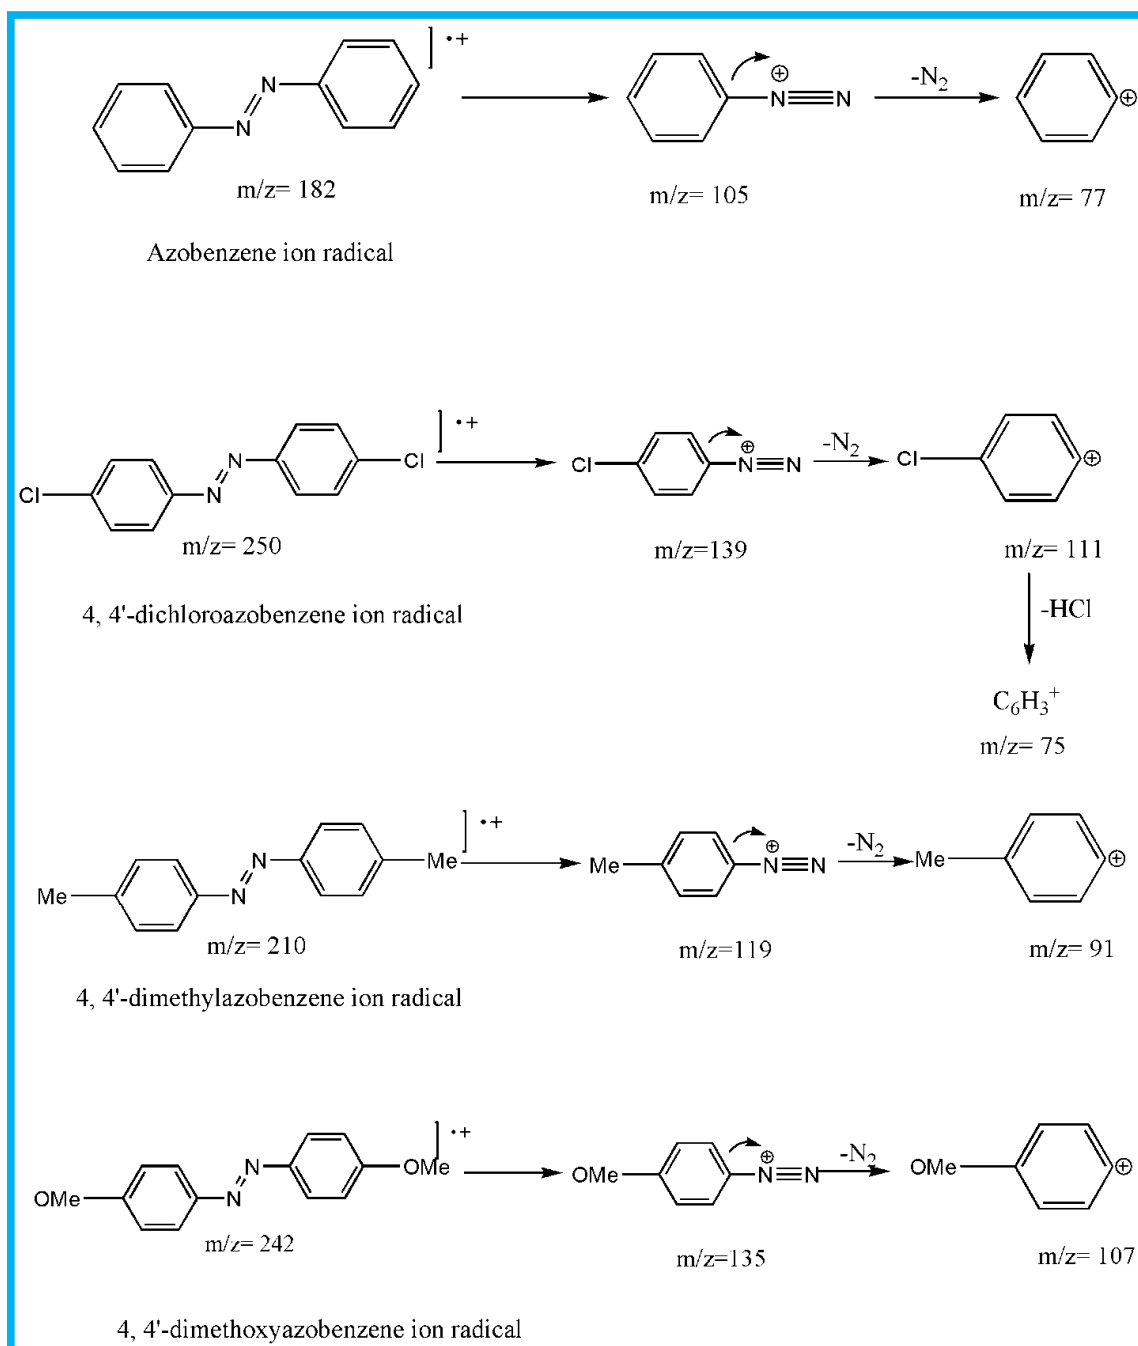

**Figure S6:** Schematic mechanism of the fragmentation pattern for the detected dimers.

Table S1: Characteristic IR frequencies of Metal hexacyanocobaltates

| <b>MHCCos</b> | <b><math>\nu_{C\equiv N}</math></b> | <b><math>\nu_{M-C}</math></b> | <b><math>\nu_{M-CN}</math></b> | <b><math>\nu_{O-H}</math></b> |
|---------------|-------------------------------------|-------------------------------|--------------------------------|-------------------------------|
| NiHCCO        | 2179                                | 462                           | 697                            | 1610                          |
| MnHCCO        | 2168                                | 447                           | 705                            | 1609                          |
| FeHCCO        | 2166                                | 454                           | 696                            | 1608                          |
